# Supplementary material
Source: PubMed Central journal article supplement (PMC3165494)
Supplement: supp_79_9_3683__1.pdf [file supp_79_9_3683__1.pdf]

## SUPPLEMENTAL INFORMATION

### Supplemental tables

TABLE S1. Strains and plasmids used in this study

| Strain or plasmid                    | Relevant genotype or phenotype                                                                                                                                                                                                                                                                                                                                                                    | Source or reference      |
|--------------------------------------|---------------------------------------------------------------------------------------------------------------------------------------------------------------------------------------------------------------------------------------------------------------------------------------------------------------------------------------------------------------------------------------------------|--------------------------|
| <b>Strain</b>                        |                                                                                                                                                                                                                                                                                                                                                                                                   |                          |
| <i>E. coli</i>                       |                                                                                                                                                                                                                                                                                                                                                                                                   |                          |
| TOP10                                | F- <i>mcrA</i> , $\Delta$ ( <i>mrr-hsdRMS-mcrBC</i> ), $\phi$ 80 <i>lacZ</i> $\Delta$ M15, $\Delta$ <i>lacX74</i> , <i>recA1</i> , <i>deoR</i> , <i>araD139</i> , $\Delta$ ( <i>ara-leu</i> )7679, <i>galU</i> , <i>galK</i> , <i>rpsL</i> (Str <sup>R</sup> ), <i>endA1</i> , <i>nupG</i>                                                                                                        | Invitrogen               |
| S17-1 $\lambda$ <i>pir</i>           | <i>recA</i> , <i>thi</i> , <i>pro</i> , <i>hsdR</i> M <sup>+</sup> , Sm <sup>R</sup> , <RP4:2-Tc:Mu:Ku:Tn7>Tp <sup>R</sup>                                                                                                                                                                                                                                                                        | (9)                      |
| <i>F. tularensis</i>                 |                                                                                                                                                                                                                                                                                                                                                                                                   |                          |
| LVS                                  | Live vaccine strain                                                                                                                                                                                                                                                                                                                                                                               | USAMRIID <sup>1</sup>    |
| $\Delta$ <i>iglA</i>                 | LVS, <i>iglA</i> in-frame deletion of codons 4-174                                                                                                                                                                                                                                                                                                                                                | (3)                      |
| $\Delta$ <i>iglC</i>                 | LVS, <i>iglC</i> in-frame deletion of codons 28-205                                                                                                                                                                                                                                                                                                                                               | (5)                      |
| $\Delta$ <i>pdpE</i>                 | LVS, <i>pdpE</i> in-frame deletion of codons 4-188                                                                                                                                                                                                                                                                                                                                                | This study               |
| $\Delta$ <i>iglG</i>                 | LVS, <i>iglG</i> in-frame deletion of codons 3-169                                                                                                                                                                                                                                                                                                                                                | This study               |
| $\Delta$ <i>iglI</i>                 | LVS, <i>iglI</i> in-frame deletion of codons 4-361                                                                                                                                                                                                                                                                                                                                                | This study               |
| $\Delta$ <i>vgrG</i>                 | LVS, <i>vgrG</i> in-frame deletion of codons 4-162                                                                                                                                                                                                                                                                                                                                                | M. Lavander, unpublished |
| U112                                 | <i>F. novicida</i> , wild-type                                                                                                                                                                                                                                                                                                                                                                    | (1)                      |
| KKF108                               | U112, $\Delta$ <i>iglI::ermC</i> , Erm <sup>R</sup>                                                                                                                                                                                                                                                                                                                                               | (2)                      |
| <i>S. cerevisiae</i>                 |                                                                                                                                                                                                                                                                                                                                                                                                   |                          |
| AH109                                | <i>MATa</i> , <i>trp1-901</i> , <i>leu2-3</i> , <i>112</i> , <i>ura3-52</i> , <i>his3-200</i> , <i>gal4</i> $\Delta$ , <i>gal80</i> $\Delta$ , <i>LYS2::GAL1</i> <sub>UAS</sub> - <i>GAL1</i> <sub>TATA</sub> - <i>HIS3</i> , <i>GAL2</i> <sub>UAS</sub> - <i>GAL2</i> <sub>TATA</sub> - <i>ADE2</i> , <i>URA3::MEL1</i> <sub>UAS</sub> - <i>MEL1</i> <sub>TATA</sub> - <i>lacZ</i> , <i>MEL1</i> | Clontech Laboratories    |
| <b>Plasmid</b>                       |                                                                                                                                                                                                                                                                                                                                                                                                   |                          |
| pCR <sup>®</sup> 4-TOPO <sup>®</sup> | TA cloning vector, Km <sup>R</sup> , Ap <sup>R</sup>                                                                                                                                                                                                                                                                                                                                              | Invitrogen               |
| pBluescript SK+                      | Cloning vector, Ap <sup>R</sup>                                                                                                                                                                                                                                                                                                                                                                   | Stratagene               |
| pDM4                                 | Suicide plasmid carrying <i>sacBR</i> , Cm <sup>R</sup>                                                                                                                                                                                                                                                                                                                                           | (7)                      |
| pJEB485                              | 2633-bp <i>XhoI/SacI</i> PCR fragment of $\Delta$ <i>iglA</i> <sub>4-174</sub> with flanking regions on pDM4, Cm <sup>R</sup>                                                                                                                                                                                                                                                                     | (3)                      |
| pJEB750                              | 2469-bp <i>XhoI/SacI</i> PCR fragment of $\Delta$ <i>pdpE</i> <sub>4-188</sub> with flanking regions on pDM4, Cm <sup>R</sup>                                                                                                                                                                                                                                                                     | This study               |
| pJEB751                              | 2517-bp <i>XhoI/SacI</i> PCR fragment of $\Delta$ <i>iglI</i> <sub>4-361</sub> with flanking                                                                                                                                                                                                                                                                                                      | This study               |

|          |                                                                                                                      |            |
|----------|----------------------------------------------------------------------------------------------------------------------|------------|
|          | regions on pDM4, Cm <sup>R</sup>                                                                                     |            |
| pJEB753  | 2425-bp <i>XhoI/SacI</i> PCR fragment of $\Delta iglG_{3-169}$ with flanking regions on pDM4, Cm <sup>R</sup>        | This study |
| pKK289Km | Expression plasmid carrying a <i>gfp</i> gene under the control of the LVS GroESL promoter, Km <sup>R</sup>          | (4)        |
| pMOL103  | pKK289Km encoding IglG-6xHis fusion protein, Km <sup>R</sup>                                                         | This study |
| pMOL42   | pKK289Km carrying pUC19 MCS from <i>HindIII</i> to <i>EcoRI</i> , with an upstream <i>NdeI</i> site, Km <sup>R</sup> | This study |
| pMOL52   | pKK289Km derivative used to construct C-terminal fusion proteins to eukaryotic GSK, Km <sup>R</sup>                  | This study |
| pMOL59   | pMOL52 encoding IglI-GSK fusion protein, Km <sup>R</sup>                                                             | This study |
| pMOL61   | pMOL52 encoding PdpE-GSK fusion protein, Km <sup>R</sup>                                                             | This study |
| pKEK1012 | pKEK894 encoding VgrG-CyaA fusion protein, Tet <sup>R</sup>                                                          | (2)        |
| pKEK1051 | pKEK894 encoding IglI-CyaA fusion protein, Tet <sup>R</sup>                                                          | (2)        |
| pJEB835  | pKEK894 encoding IglG-CyaA fusion protein, Tet <sup>R</sup>                                                          | This study |
| pJEB851  | pKEK894 encoding IglI (LVS)-CyaA fusion protein, Tet <sup>R</sup>                                                    | This study |

1

2 <sup>1</sup> US Army Medical Research Institute of Infectious Diseases, Fort Detrick, Frederick, MD, USA.

3

4

1 TABLE S2. Oligonucleotides used in this study

| Purpose                 | Oligonucleotide pair(s)                                                                                                                                                                                                                                                                             |
|-------------------------|-----------------------------------------------------------------------------------------------------------------------------------------------------------------------------------------------------------------------------------------------------------------------------------------------------|
| <i>LVS null mutants</i> |                                                                                                                                                                                                                                                                                                     |
| PdpE Δ4-188 (pJEB750)   | PdpE_a: 5'-CTC GAG GTA AGA TCG GAG TTG ATT CTA A-3' ( <i>XhoI</i> ) and PdpE_b: 5'-GGA TCC ACT ATA ATA TAA CTC TAG TTA AGA A-3' ( <i>BamHI</i> )<br>PdpE_c: 5'-GGA TCC TTT ACT CAT ATA TTT GTA TCC TTA A -3' ( <i>BamHI</i> ), PdpE_d: 5'-GAG CTC ATA CGC GAT ATT GCT ACG GA-3' ( <i>SacI</i> )     |
| IglG Δ3-169 (pJEB753)   | IglG_a: 5'-CTC GAG GAA TAC ATA TTC TTA GAG ATA ATC-3' ( <i>XhoI</i> ) and IglG_b: 5'-GGA TCC GTA AAA ACA TCT TAG AAG GTC AT-3' ( <i>BamHI</i> )<br>IglG_c: 5'-GGA TCC TAA CAT TTA AAT TTT CCA ATA AGC T-3' ( <i>BamHI</i> ) and IglG_d: 5'-GAG CTC AAA TCA TAT TTC GAT ACG CTC A-3' ( <i>SacI</i> ) |
| IglI Δ4-361 (pJEB751)   | IglI_a: 5'-CTC GAG GGC ATA AAT GAT GTT AAC TTA TG-3' ( <i>XhoI</i> ) and IglI_b: 5'-GAT ATC AAT GAC CCC GTA GAA AAA ATT TC-3' ( <i>EcoRV</i> )<br>IglI_c: 5'-GAT ATC CTG ACT CAT ATA AAT CTC CTC-3' ( <i>EcoRV</i> ) and IglI_d: 5'-ACT AGT AGT ATT ATC TGT TTA TGA GAA TAA T-3' ( <i>SpeI</i> )    |
| <i>Complementation</i>  |                                                                                                                                                                                                                                                                                                     |
| IglG-6xHis (pMOL103)    | pigD_for: 5'-CAT ATG TTA AAT ATT ATA AAT GAC TCC-3' ( <i>NdeI</i> ) and pigD_6xH_rev_C: 5'-GAA TTC CTA ATG ATG ATG ATG ATG ATG AGA TGT TTT TAC ATT TAT TTG TC-3' ( <i>EcoRI</i> )                                                                                                                   |
| IglI-GSK (pMOL59)       | pigG_for: 5'-CAT ATG AGT CAG ATA ATA TCT ACA C-3' ( <i>NdeI</i> ) and pigG_gsk_rev: 5'-GGT ACC TAT GTC AAA AAG ATC TTC AAA ATA -3' ( <i>KpnI</i> )                                                                                                                                                  |
| PdpE-GSK (pMOL61)       | pigI_for: 5'-CAT ATG AGT AAA AAA ATA TTT AAA TTA TTA-3' ( <i>NdeI</i> ) and pigI_gsk_rev: 5'-GGT ACC TAT TAT AGT AAT TTT CTT TTC ATA AT-3' ( <i>KpnI</i> )                                                                                                                                          |
| IglG-CyaA (pJEB835)     | IglG_Cya_F: 5'-CCA TGG AAA TGT TAA ATA TTA TAA ATG ACT CCT T-3' ( <i>NcoI</i> ) and IglG_Cya_R: 5'-CAT ATG AGA TGT TTT TAC ATT TAT TTG TCC ACT A-3' ( <i>NdeI</i> )                                                                                                                                 |
| IglI-CyaA (pJEB851)     | IglI_Cya_F: 5'-CCA TGG AAA TGA GTC AGA TAA TAT CTA CAC TA-3' ( <i>NcoI</i> ) and IglI_Cya_R: 5'-CAT ATG TAT GTC AAA AAG ATC TTC AAA ATA GT -3' ( <i>NdeI</i> )                                                                                                                                      |

- 1 The nucleotide sequences in italics represent the incorporated *NdeI*, *EcoRI*, *BamHI*, *SacI*, *XhoI*, *KpnI*, *EcoRV*, *SpeI*, and *NcoI* restriction sites used for cloning of
- 2 the PCR amplified DNA fragments.

1 TABLE S3. Quantitative real time PCR analysis of  $\Delta pdpE$ ,  $\Delta iglG$  and  $\Delta iglI$  mutants

2

| Gene        | Strain        |               |               |
|-------------|---------------|---------------|---------------|
|             | $\Delta pdpE$ | $\Delta iglG$ | $\Delta iglI$ |
| <i>pdpA</i> | 1.80 ± 0.83   | 0.89 ± 0.45   | 1.43 ± 0.73   |
| <i>icmF</i> | 1.76 ± 0.59   | 1.62 ± 0.46   | 1.91 ± 0.75   |
| <i>iglE</i> | 1.83 ± 0.75   | 1.23 ± 0.68   | 2.07 ± 0.56   |
| <i>vgrG</i> | 1.76 ± 0.77   | 1.25 ± 0.97   | 2.03 ± 1.05   |
| <i>iglF</i> | 1.41 ± 0.53   | 2.04 ± 0.85   | 1.67 ± 0.48   |
| <i>iglG</i> | 1.27 ± 0.07*  | NA            | 1.06 ± 0.15   |
| <i>iglH</i> | 1.39 ± 0.34   | 0.80 ± 0.43   | 1.36 ± 0.47   |
| <i>dotU</i> | 1.69 ± 0.75   | 1.26 ± 0.66   | 1.27 ± 0.13   |
| <i>iglI</i> | 1.88 ± 0.63   | 1.56 ± 0.41   | NA            |
| <i>iglJ</i> | 1.57 ± 0.60   | 1.71 ± 0.60   | 2.14 ± 0.72   |
| <i>pdpC</i> | 1.47 ± 0.70   | 1.32 ± 0.60   | 1.17 ± 0.53   |
| <i>pdpE</i> | NA            | 1.12 ± 0.43   | 1.83 ± 0.34   |
| <i>iglD</i> | 0.81 ± 0.25   | 0.90 ± 0.48   | 0.87 ± 0.42   |
| <i>iglC</i> | 1.21 ± 0.22   | 0.74 ± 0.18   | 1.18 ± 0.18   |
| <i>iglB</i> | 1.45 ± 1.00   | 0.95 ± 0.48   | 1.47 ± 1.09   |
| <i>iglA</i> | 1.74 ± 0.78   | 1.25 ± 0.10   | 1.80 ± 1.04   |
| <i>pdpD</i> | 1.24 ± 1.31   | 1.59 ± 1.00   | 2.15 ± 1.43   |

3

4 The N-fold differential expression of each target gene in  $\Delta iglG$ ,  $\Delta iglI$  or  $\Delta pdpE$  mutants compared to the relative  
5 expression of the same gene in LVS was defined as  $2^{-\Delta\Delta CT}$  (6). As before (8), the range of mRNA expression was  
6 defined by the N-fold change as follows: overexpressed (N-fold change  $\geq 2.0$ , gray box) or underexpressed (N-fold  
7 change  $\leq 0.5$ ). Data are mean  $\pm$  standard deviation of 3 independent experiments. A 2-sided paired Student's *t*-test  
8 was used to estimate if gene expression was significantly different in mutants compared to LVS. \*  $P < 0.05$ . NA =  
9 not applicable.

## REFERENCES

- 1  
2  
3 **1. Anthony, L. D., R. D. Burke, and F. E. Nano. 1991.** Growth of *Francisella* spp. in  
4 rodent macrophages. *Infect Immun* **59**:3291-3296.
- 5 **2. Barker, J. R., A. Chong, T. D. Wehrly, J. J. Yu, S. A. Rodriguez, J. Liu, J. Celli, B.**  
6 **P. Arulanandam, and K. E. Klose. 2009.** The *Francisella tularensis* pathogenicity  
7 island encodes a secretion system that is required for phagosome escape and virulence.  
8 *Mol Microbiol* **74**:1459-1470.
- 9 **3. Bröms, J. E., M. Lavander, and A. Sjöstedt. 2009.** A conserved  $\alpha$ -helix essential for a  
10 type VI secretion-like system of *Francisella tularensis*. *J Bacteriol* **191**:2431-46.
- 11 **4. Bönquist, L., H. Lindgren, I. Golovliov, T. Guina, and A. Sjöstedt. 2008.** MglA and  
12 Igl proteins contribute to the modulation of *Francisella tularensis* live vaccine strain-  
13 containing phagosomes in murine macrophages. *Infect Immun* **76**:3502-3510.
- 14 **5. Golovliov, I., A. Sjöstedt, A. Mokrievich, and V. Pavlov. 2003.** A method for allelic  
15 replacement in *Francisella tularensis*. *FEMS Microbiol Lett* **222**:273-280.
- 16 **6. Livak, K. J., and T. D. Schmittgen. 2001.** Analysis of relative gene expression data  
17 using real-time quantitative PCR and the 2<sup>-</sup>(Delta Delta C(T)) Method. *Methods* **25**:402-  
18 408.
- 19 **7. Milton, D. L., R. O'Toole, P. Hörstedt, and H. Wolf-Watz. 1996.** Flagellin A is  
20 essential for the virulence of *Vibrio anguillarum*. *J Bacteriol* **178**:1310-1319.
- 21 **8. Shou, J. Z., N. Hu, M. Takikita, M. J. Roth, L. L. Johnson, C. Giffen, Q. H. Wang,**  
22 **C. Wang, Y. Wang, H. Su, L. H. Kong, M. R. Emmert-Buck, A. M. Goldstein, S. M.**  
23 **Hewitt, and P. R. Taylor. 2008.** Overexpression of CDC25B and LAMC2 mRNA and

1 protein in esophageal squamous cell carcinomas and premalignant lesions in subjects  
2 from a high-risk population in China. *Cancer Epidemiol Biomarkers Prev* **17:1424-1435**.  
3 **9. Simon, R., U. Priefer, and A. Pühler. 1983.** A broad host range mobilisation system for  
4 in *vivo* genetic engineering: transposon mutagenesis in Gram negative bacteria.  
5 *Biotechnology* **1:787-796**.
